# Supplementary material for: Impacts of the photo-driven post-depositional processing on snow nitrate and its isotopes at Summit, Greenland: a model-based study
Source: Copernicus journal article supplement (doi:10.5194/tc-15-4207-2021), 2021-09-03
Supplement: Supplementary file 1 [file tc-15-4207-2021-supplement.pdf]

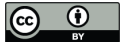

*Supplement of*

## **Impacts of the photo-driven post-depositional processing on snow nitrate and its isotopes at Summit, Greenland: a model-based study**

**Zhuang Jiang et al.**

*Correspondence to:* Lei Geng ([genglei@ustc.edu.cn](mailto:genglei@ustc.edu.cn))

The copyright of individual parts of the supplement might differ from the article licence.

### Wavelength-dependent $\varepsilon_p$ and its impact on $\delta^{15}\text{N}$ of FP.

In TRANSITS, the time step was set to one week. However, the actinic flux also fluctuates within one week. To calculate the integral effect in this time step, we first computed the actinic flux at different solar zenith angle (50 to 90 ° at Summit) by setting a constant TCO value from observation:

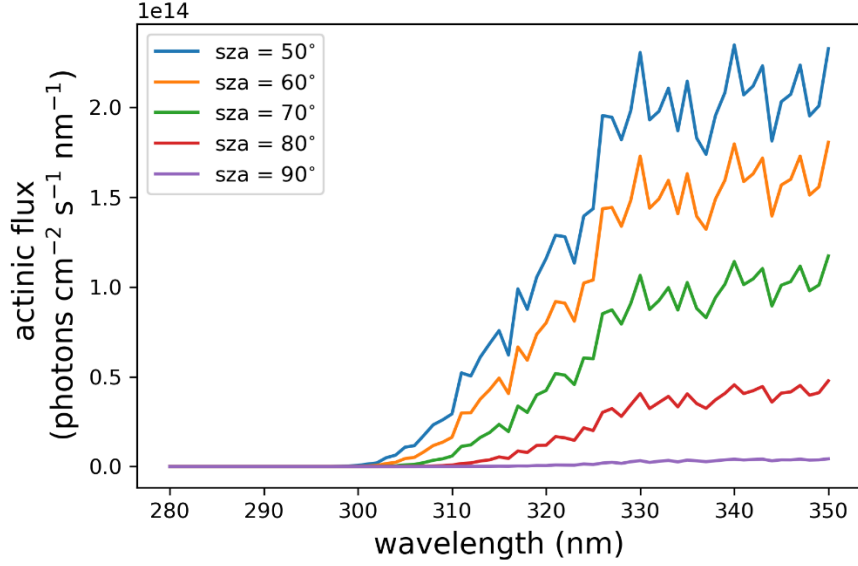

**Figure S1.** The computed actinic flux at snow surface under different solar zenith angle at Summit with a TCO of 300 DU as example.

Then we calculated the photolysis rate constant and fractionation factor at each solar zenith angle by:

$${}^{14}J(\text{sza}) = \int_{280 \text{ nm}}^{350 \text{ nm}} \Phi(\lambda) \times {}^{14}\sigma_{\text{NO}_3^-}(\lambda) \times I(z, \lambda) d\lambda$$

$${}^{15}J(\text{sza}) = \int_{280 \text{ nm}}^{350 \text{ nm}} \Phi(\lambda) \times {}^{15}\sigma_{\text{NO}_3^-}(\lambda) \times I(z, \lambda) d\lambda$$

$$\varepsilon_p = \frac{{}^{14}J(\text{sza})}{{}^{15}J(\text{sza})} - 1$$

The calculated results are shown below:

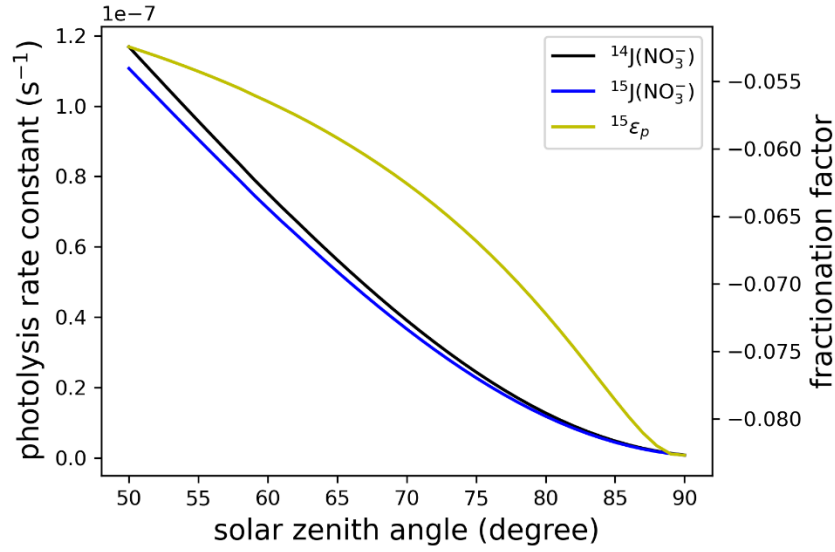

**Figure S2.** The computed nitrate photolysis rate constant and fractionation factor ( $\epsilon_p$ ) under different solar zenith angle at Summit with a TCO of 300 DU as example.

The overall effect in one week can be calculated as below:

$$\bar{J} = \frac{\int J(sza) \times t(sza) \times d(sza)}{\int t(sza) \times d(sza)}$$

and:

$$\bar{\epsilon}_p = \frac{\int \epsilon_p(sza) \times t(sza) \times d(sza)}{\int \epsilon_p(sza) \times d(sza)}$$

As can be seen in the above equations, the photolysis fractionation factor ( $\epsilon_p$ ) is closely linked with the mean solar zenith angle in each week. Although the  $\delta^{15}\text{N}(\text{NO}_3^-)$  of the bulk snowpack would also change owing to mass balance, its effect was muted by the large variation in  $\epsilon_p$ , and  $\delta^{15}\text{N}$  of FP was completely controlled by the variation in  $\epsilon_p$ .

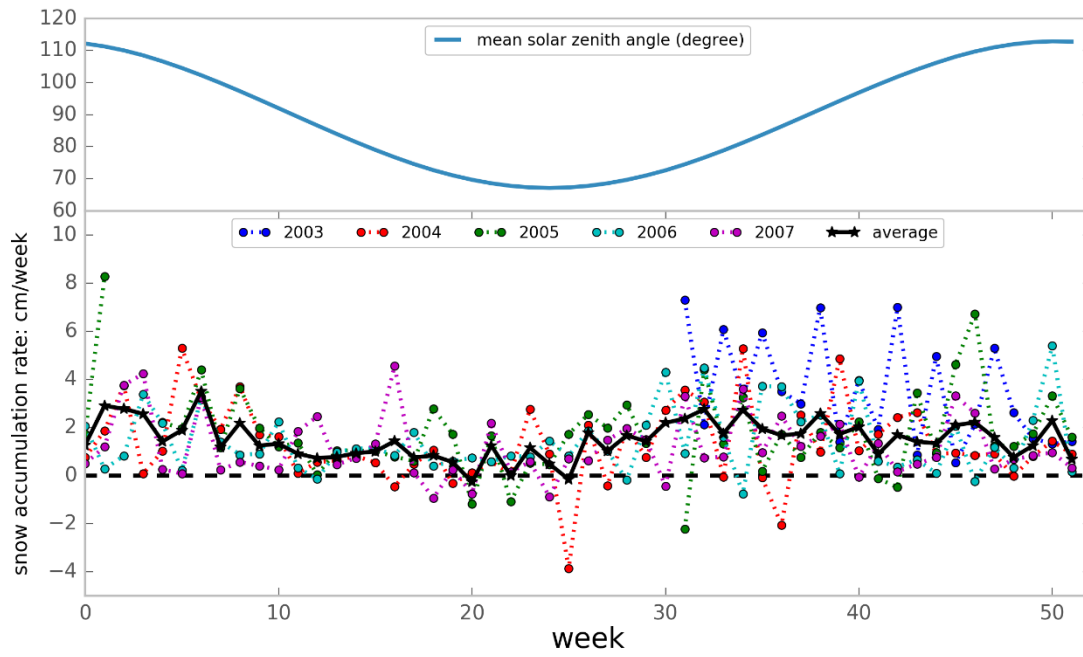

**Figure S3.** Solar zenith angle and the weekly snow accumulation observations at Summit, Greenland. The thick black curve represents the average over the 5 years, and others were the observations in each year from 2003-2007.

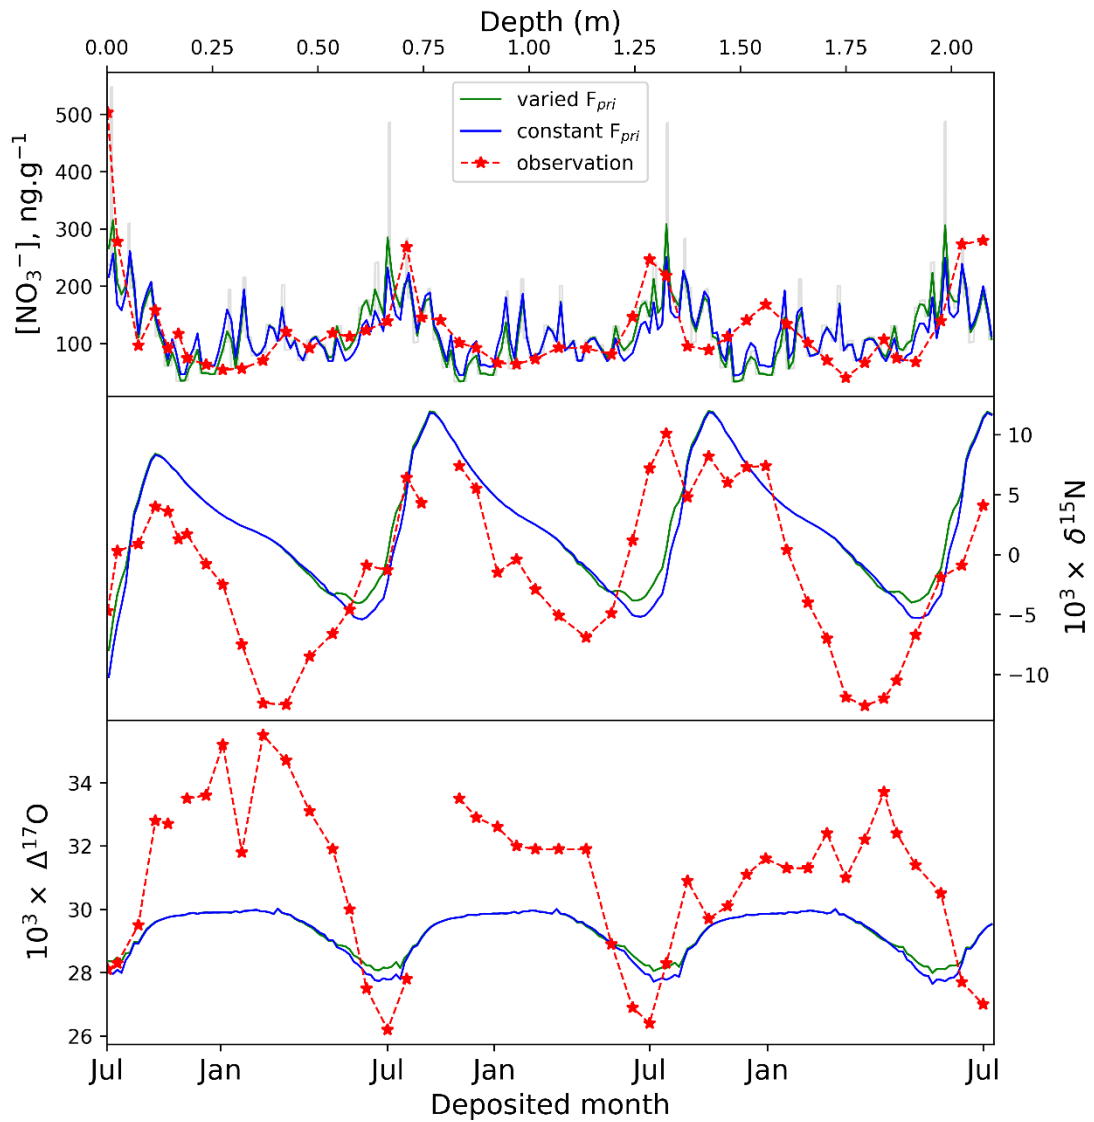

**Figure S4.** The impact of choosing different  $F_{pri}$  on modeled snow nitrate profiles. Varied  $F_{pri}$ : using seasonally-varied  $F_{pri}$  as seen in Figure 1a. Constant  $F_{pri}$ : using constant  $F_{pri}$  throughout the year. Note the annual amount of  $F_{pri}$  was kept same in these two scenarios.

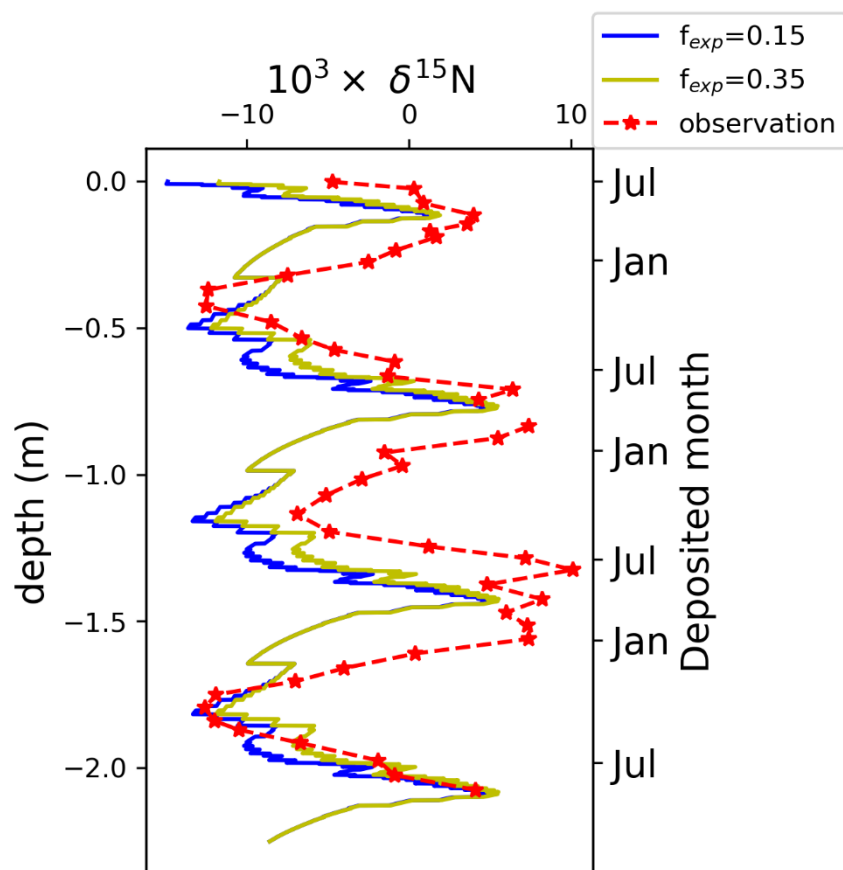

**Figure S5.** The modelled seasonal  $\delta^{15}\text{N}(\text{NO}_3^-)$  with different  $f_{\text{exp}}$  (the export fraction).

**Table S1**

| parameter                           | description                                       | value                                                   | reference                        |
|-------------------------------------|---------------------------------------------------|---------------------------------------------------------|----------------------------------|
| $h$                                 | Boundary layer height                             | 156 m                                                   | Cohen et al., 2007               |
| T                                   | Temperature                                       | -                                                       | NOAA observation                 |
| P                                   | Pressure                                          | -                                                       | NOAA observation                 |
| TCO                                 | Total column ozone                                |                                                         | NOAA observation                 |
| $\text{O}_3$                        | Ozone concentration                               |                                                         | NOAA observation                 |
| BrO                                 | BrO concentration                                 | 2 pptv                                                  | Fibiger et al., 2016             |
| OH/HO <sub>2</sub> /RO <sub>2</sub> | OH/HO <sub>2</sub> /RO <sub>2</sub> concentration | -                                                       | Sjostedt et al., 2007            |
| $f_{\text{exp}}$                    | Nitrate export fraction                           | 0.35                                                    | calculated                       |
| A                                   | Snow accumulation rate                            | 250 kg m <sup>-2</sup> a <sup>-1</sup>                  | Dibb et al., 2004                |
| $\rho$                              | Snow density                                      | 0.35 g cm <sup>-3</sup>                                 | Geng et al., 2014                |
| $\Phi$                              | Quantum yield                                     | 0.002                                                   | <sup>1</sup> Scaled.             |
| $\sigma$                            | Nitrate cross section                             | -                                                       | Berhanu et al., 2014             |
| $f_{\text{cage}}$                   | Cage effect                                       | 0.15                                                    | Erbland et al., 2015             |
| $F_{\text{pri}}$                    | Primary input nitrate                             | 6.6×10 <sup>-6</sup> kgN m <sup>2</sup> a <sup>-1</sup> | <sup>2</sup> Iizuka et al., 2018 |

|              |                                         |       |                      |
|--------------|-----------------------------------------|-------|----------------------|
| $\epsilon_d$ | Nitrate deposition fractionation factor | +10 % | Erbland et al., 2013 |
|--------------|-----------------------------------------|-------|----------------------|

\*1. The quantum yield of nitrate photolysis was scaled by comparing the measured surface  $j_0(\text{NO}_3^-)$  (Galbavy et al., 2007) with the modelled actinic flux at Summit.

\*2. The magnitude of  $F_{pri}$  were estimated from the observed snowpack from Geng et al. (2014). The seasonal variation of  $F_{pri}$  were scaled according to Iizuka et al. (2018).
